# Supplementary material for: Grass-like NixSey nanowire arrays shelled with NiFe LDH nanosheets as a 3D hierarchical core–shell electrocatalyst for efficient upgrading of biomass-derived 5-hydroxymethylfurfural and furfural
Source: Royal Society of Chemistry journal article supplement (doi:10.1039/d1cy01816g), 2021-11-05
Supplement: d1cy01816g1.pdf [file d1cy01816g1.pdf]

## Supplementary Information

### **Grass-like Ni<sub>x</sub>Se<sub>y</sub> nanowire arrays shelled with NiFe LDH nanosheets as a 3D hierarchical core-shell electrocatalyst for efficient upgrading of biomass-derived 5-hydroxymethylfurfural and furfural**

Yan Zhong<sup>a</sup>, Ru-Quan Ren<sup>a</sup>, Jian-Bo Wang<sup>a</sup>, Yi-Yi Peng<sup>a</sup>, Qiang Li<sup>\*b</sup> and Yong-Ming Fan<sup>\*a</sup>

a. Key Laboratory of Lignocellulosic Chemistry, College of Material Science and Technology, Beijing Forestry University, Beijing, 100083, China.

b. College of Science, Beijing Forestry University, Beijing 100083, China.

\*. Corresponding Author. E-mail: fanym@bjfu.edu.cn; liqiang@bjfu.edu.cn.

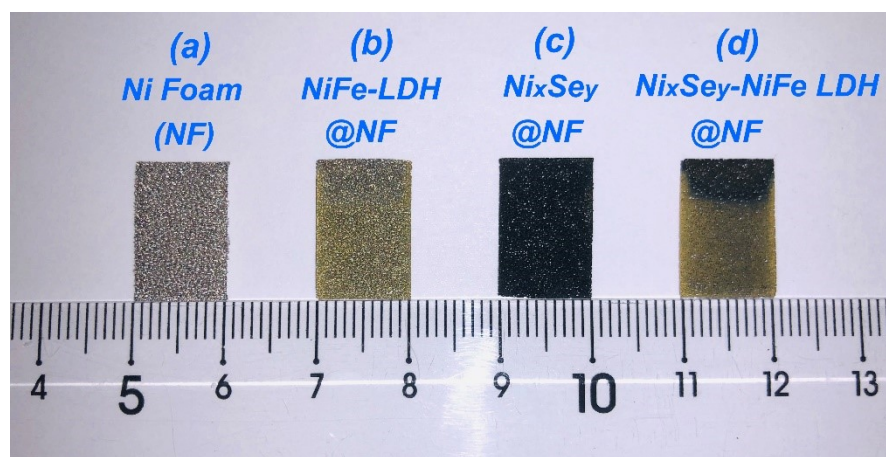

**Figure S1** Digital images of as-prepared electrodes: (a) Ni foam; (b) NiFe-LDH@NF; (c) Ni<sub>x</sub>Se<sub>y</sub>@NF; (d) Ni<sub>x</sub>Se<sub>y</sub>-NiFe LDH@NF.

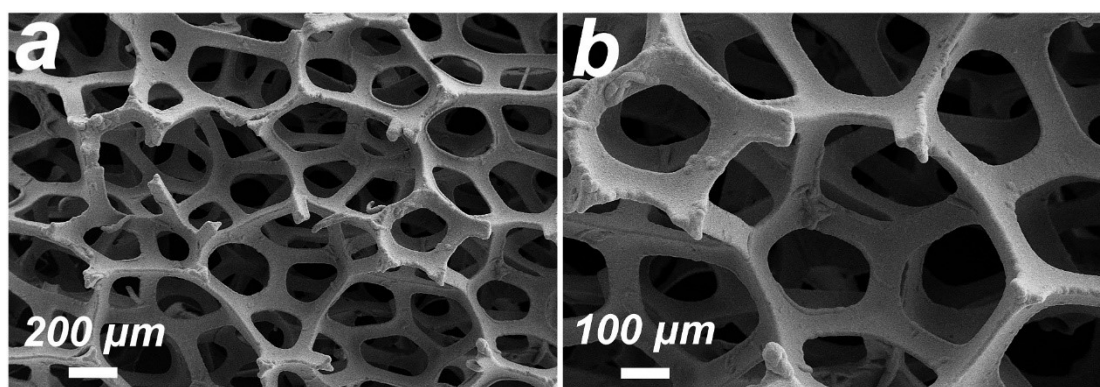

**Figure S2** SEM images of commercial Ni foam at different magnifications.

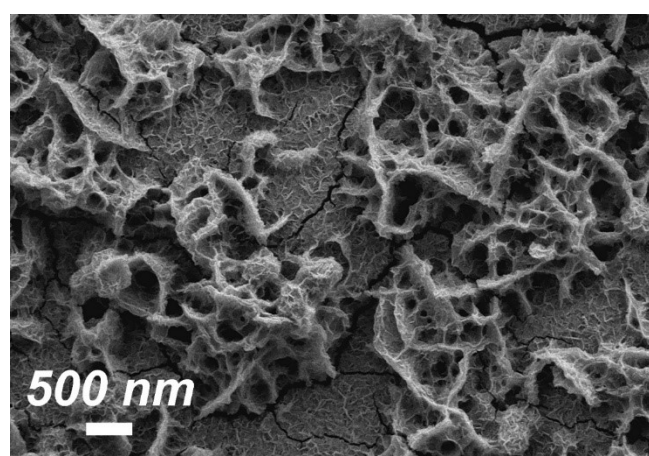

**Figure S3** SEM image of NiFe-LDH nanosheets on Ni foam.

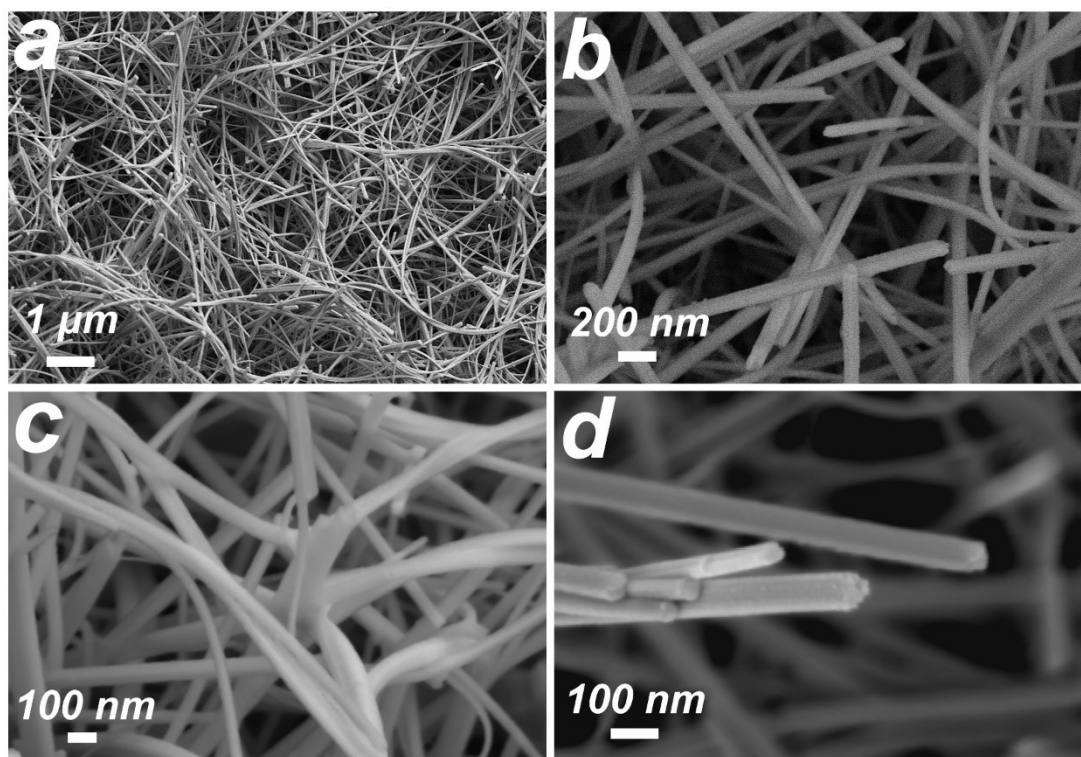

**Figure S4** SEM images of  $\text{Ni}_x\text{Se}_y@NF$  nanowire arrays at low and high magnifications.

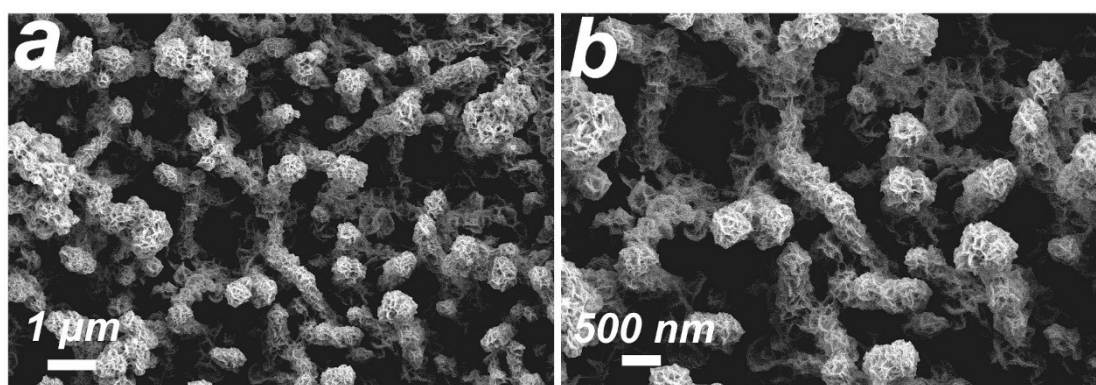

**Figure S5** SEM images of  $\text{Ni}_x\text{Se}_y\text{-NiFe LDH}@NF$  at low and high magnifications.



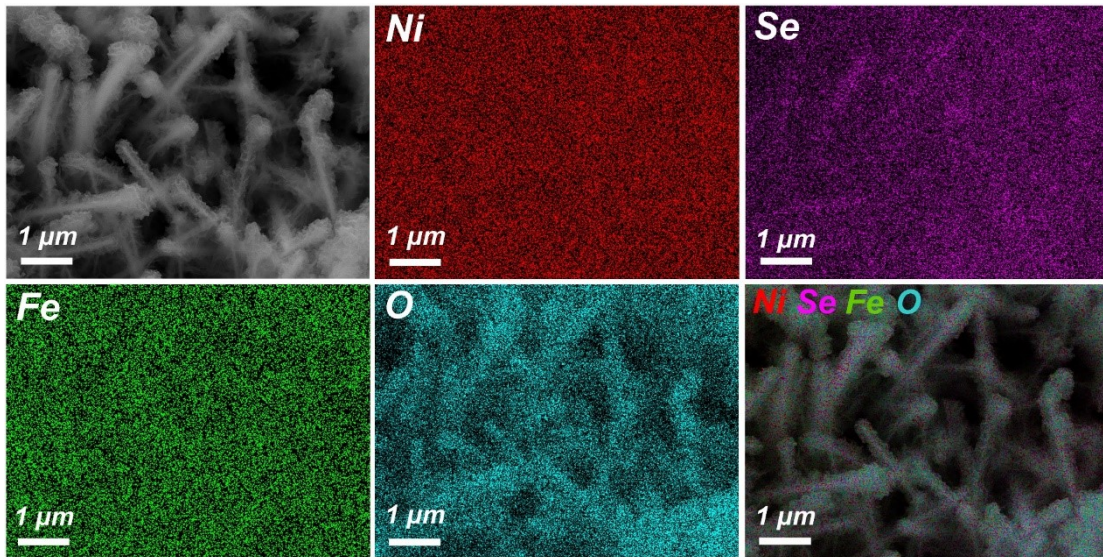

**Figure S6** SEM elemental mapping images of  $\text{Ni}_x\text{Se}_y\text{-NiFe LDH@NF}$  electrode.

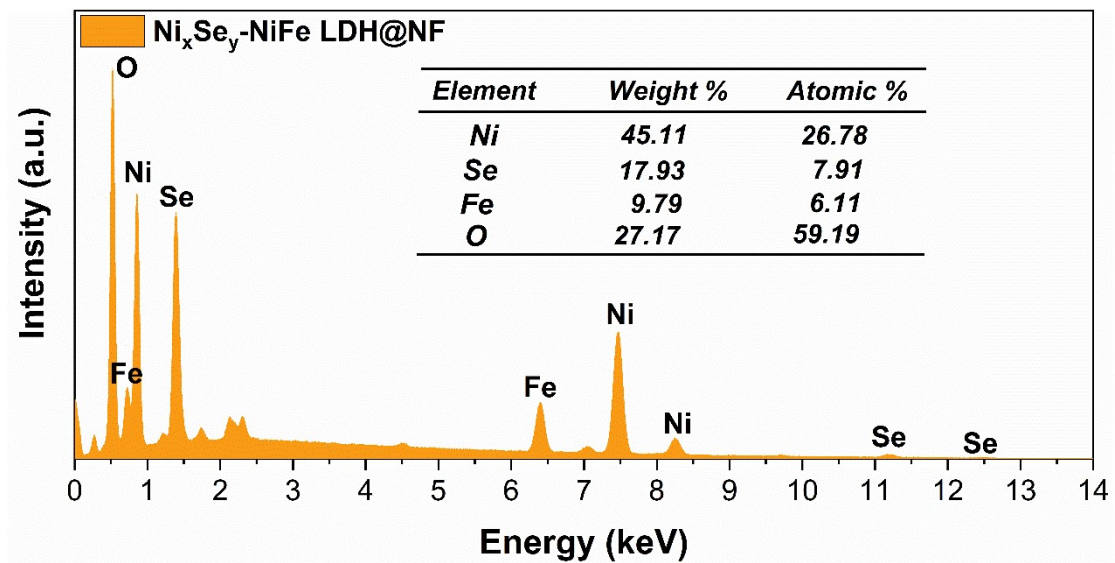

**Figure S7** Energy-dispersive X-ray (EDX) spectrum of  $\text{Ni}_x\text{Se}_y\text{-NiFe LDH@NF}$  under SEM mode.

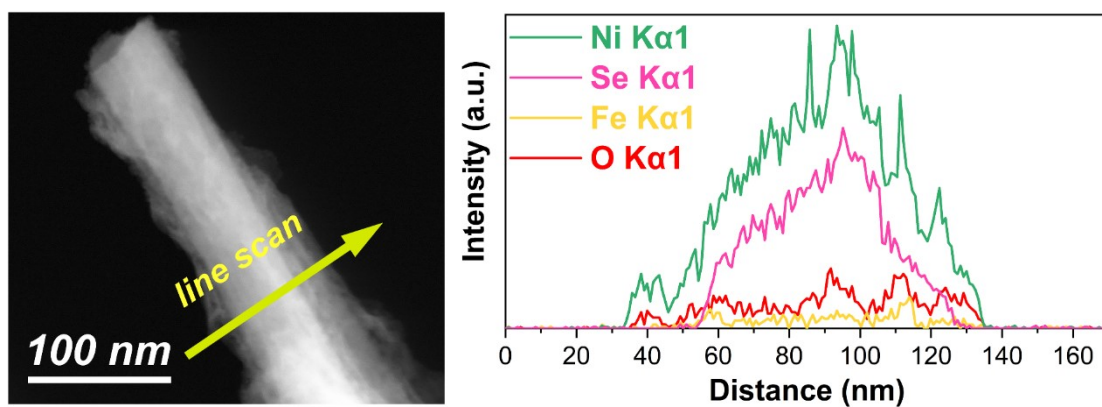

Figure S8 TEM line-scan analysis of  $\text{Ni}_x\text{Se}_y\text{-NiFe}$  LDH core-shell structure.

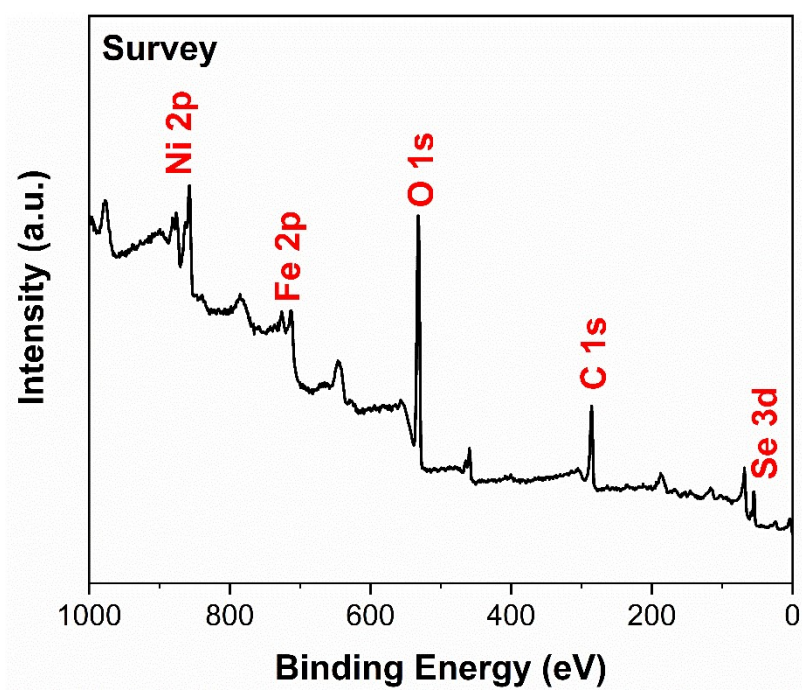

Figure S9 XPS full survey spectrum of  $\text{Ni}_x\text{Se}_y\text{-NiFe}$  LDH@NF.

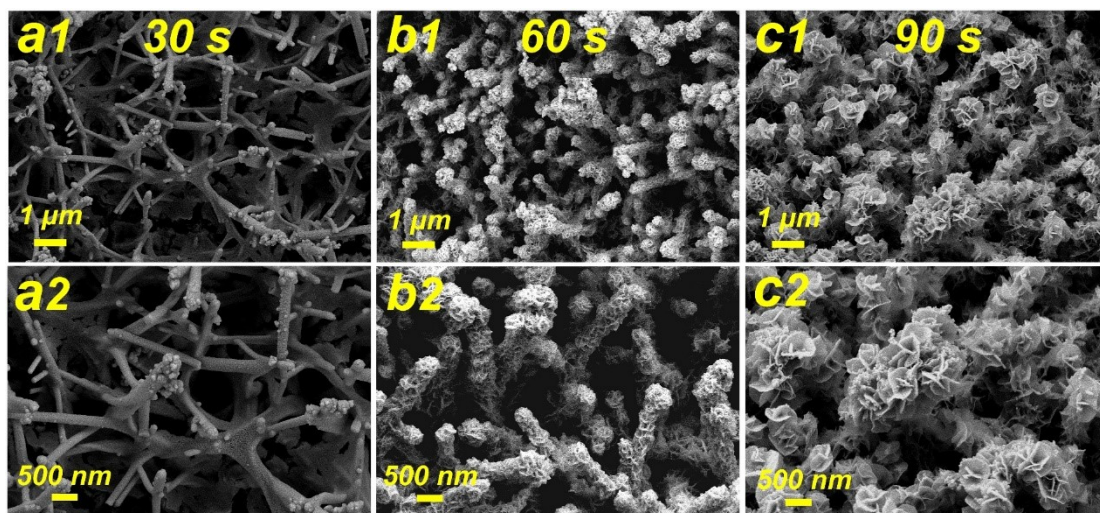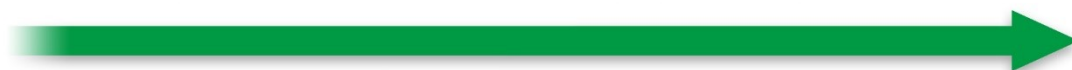

***Increasing the electrodeposition time***

**Figure S10** SEM images of (a1,a2) Ni<sub>x</sub>Se<sub>y</sub>-NiFe LDH@NF-30s; (b1,b2) Ni<sub>x</sub>Se<sub>y</sub>-NiFe LDH@NF-60s, and (c1,c2) Ni<sub>x</sub>Se<sub>y</sub>-NiFe LDH@NF-90s at low and high magnifications.



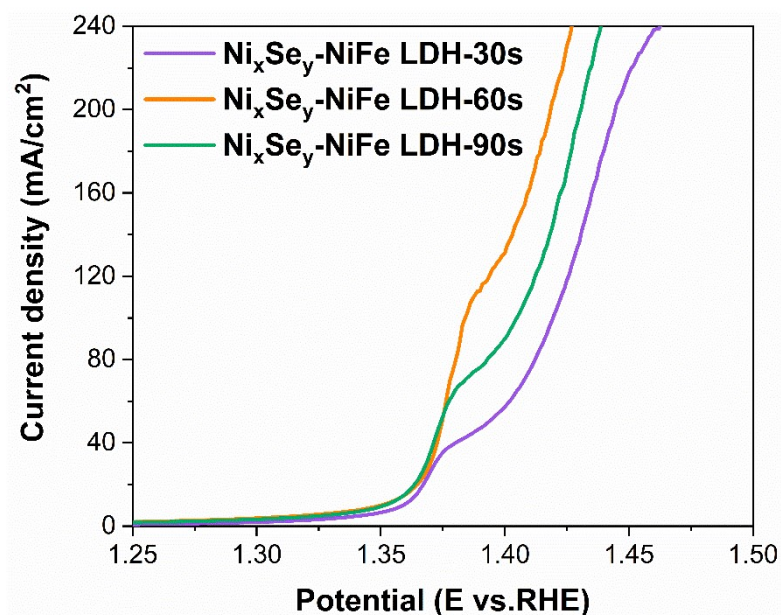

**Figure S11** Linear sweep voltammetry curves of  $\text{Ni}_x\text{Se}_y\text{-NiFe LDH@NF-30s}$ ;  $\text{Ni}_x\text{Se}_y\text{-NiFe LDH@NF-60s}$ ;  $\text{Ni}_x\text{Se}_y\text{-NiFe LDH@NF-90s}$  in 1M KOH with HMF.

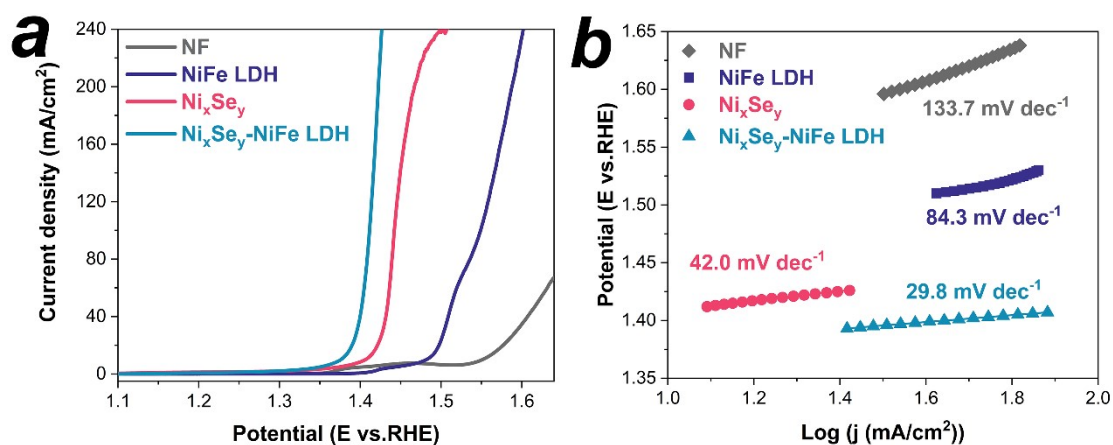

**Figure S12** (a) Linear sweep voltammetry (LSV) curves of NF; NiFe LDH@NF;  $\text{Ni}_x\text{Se}_y\text{@NF}$  and  $\text{Ni}_x\text{Se}_y\text{-NiFe LDH@NF}$  for FUR oxidation and (b) the corresponding Tafel Plots.

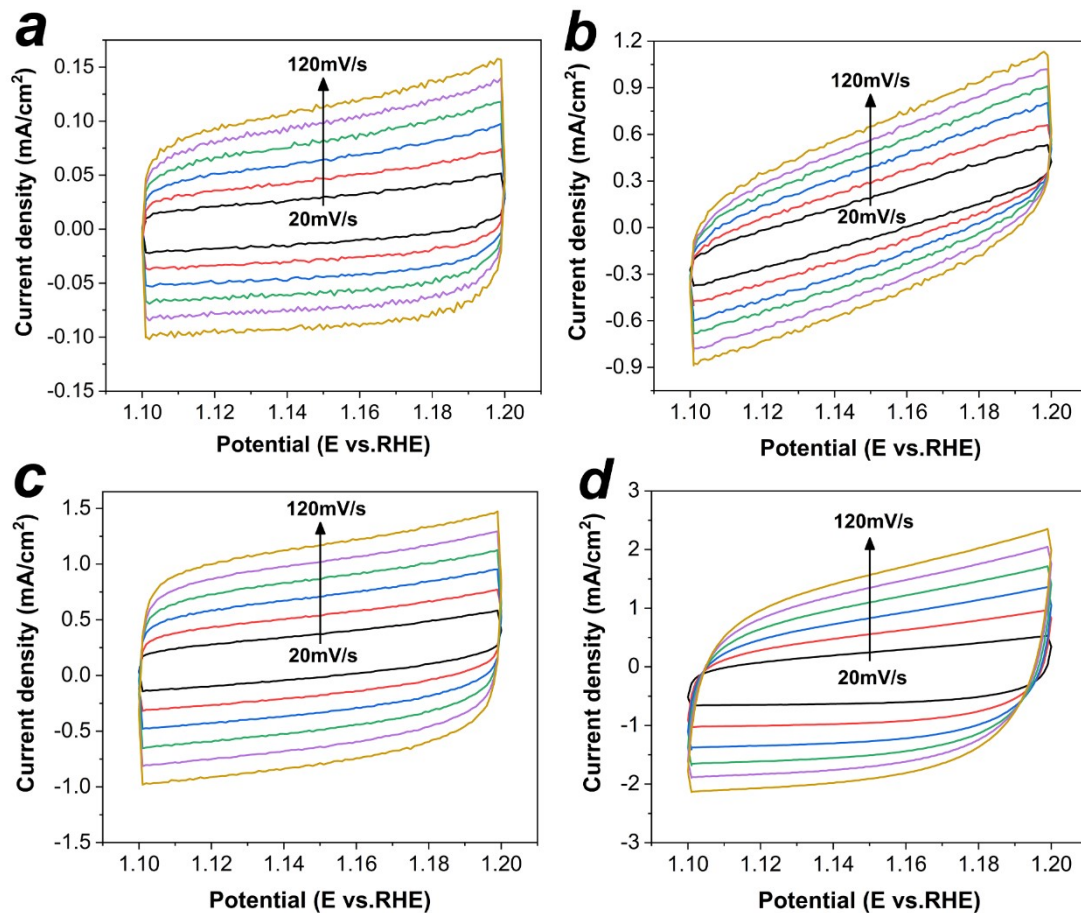

**Figure S13** Cyclic voltammety scans over (a) NF; (b) NiFe LDH@NF; (c)  $\text{Ni}_x\text{Se}_y$ @NF and (d)  $\text{Ni}_x\text{Se}_y$ -NiFe LDH@NF with different scan rates in the non-Faraday region.

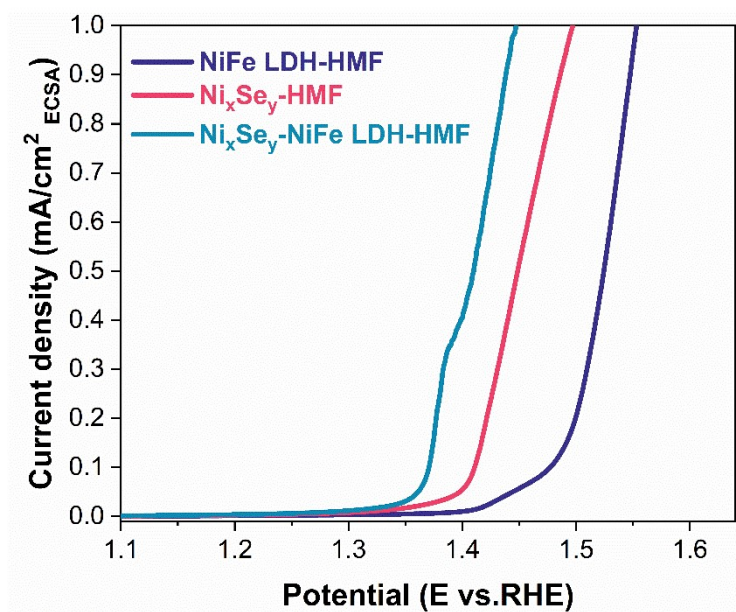

**Figure S14** LSV curves with current density normalized by the calculated ECSA of the different catalysts for HMF oxidation.



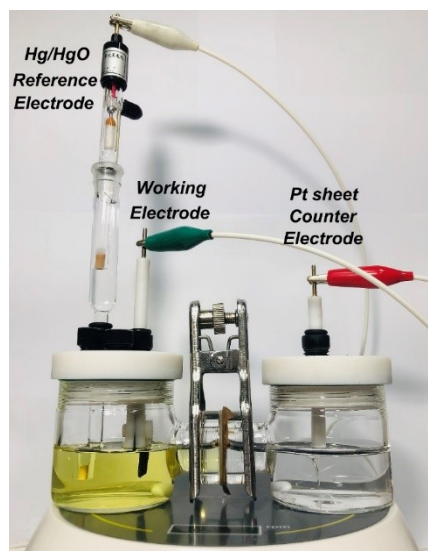

**Figure S15** Digital photograph of the three-electrode cell device used for electrochemical oxidation of HMF and FUR.

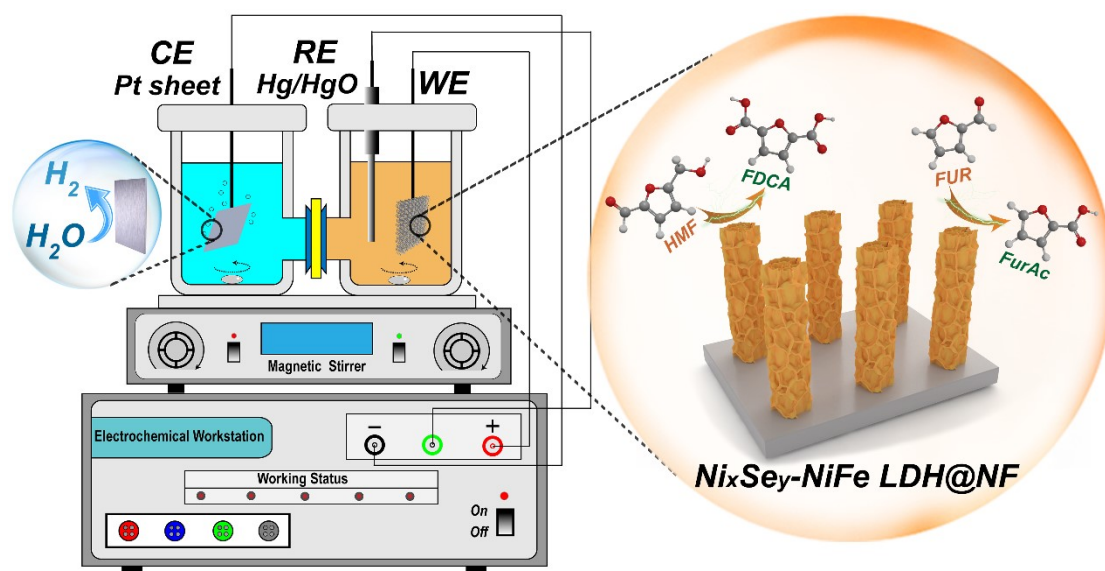

**Figure S16** Schematic illustration of the electrochemical device used for electrochemical oxidation of HMF and FUR.

### The anode, cathode, and overall reactions for HMF electrochemical oxidation

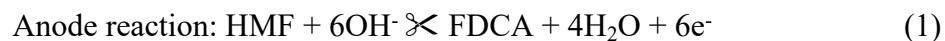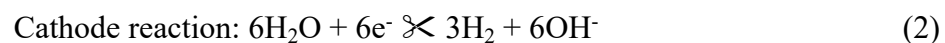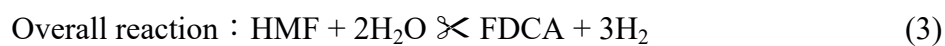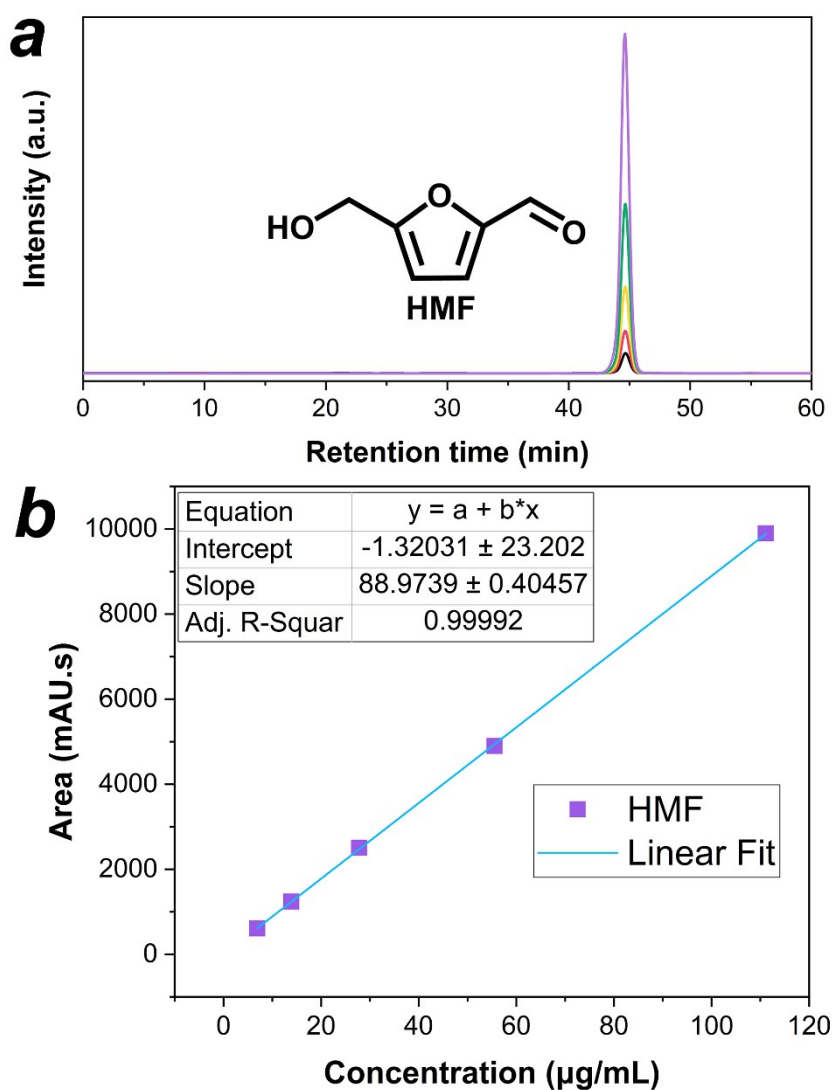

**Figure S17** HPLC spectra for (a) standard product of HMF and (b) corresponding calibration curve.

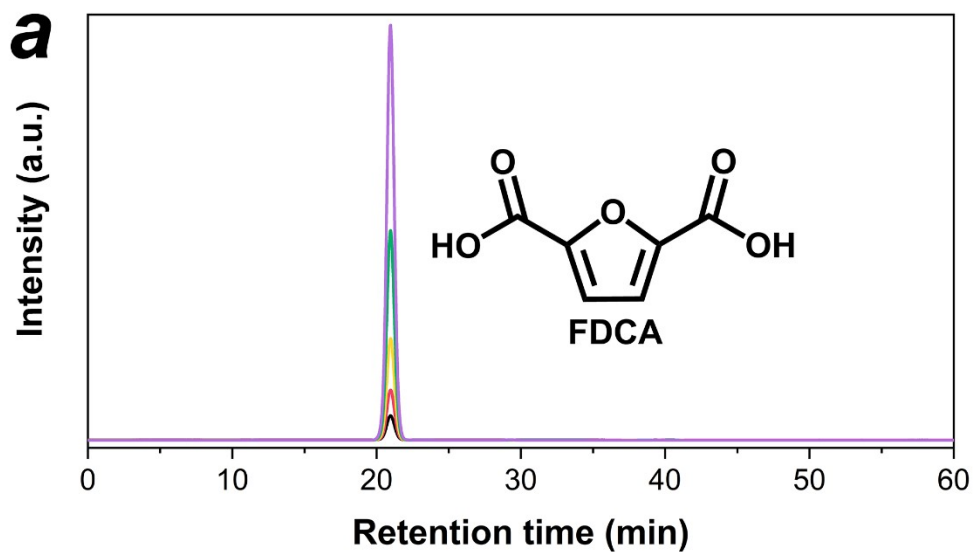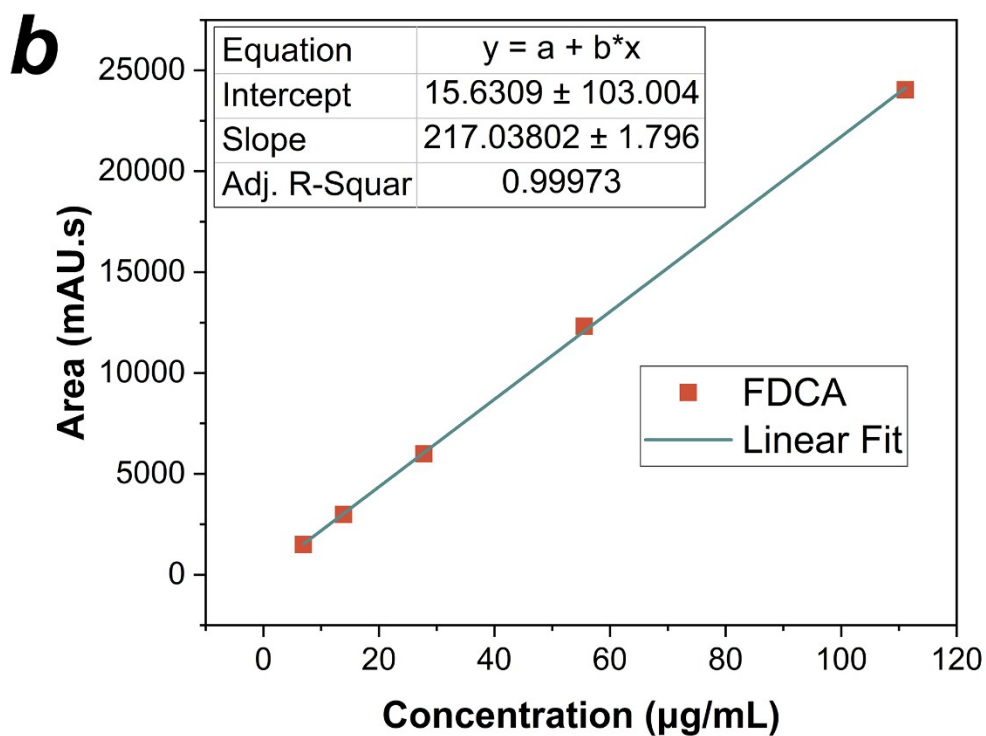

**Figure S18** HPLC spectra for (a) standard product of FDCA and (b) corresponding calibration curve.



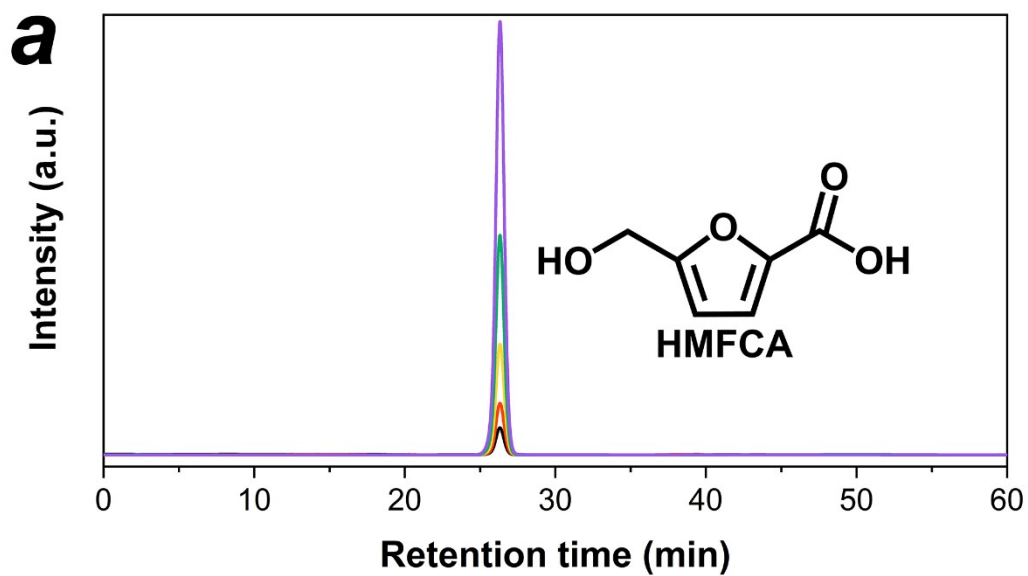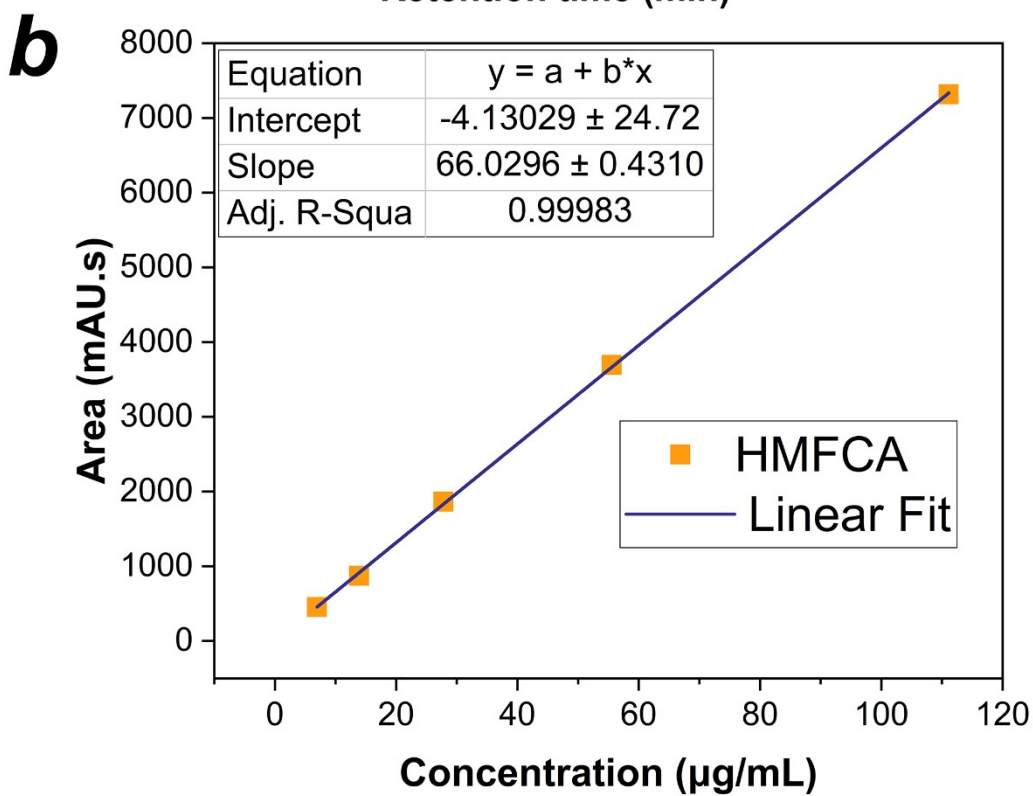

**Figure S19** HPLC spectra for (a) standard product of HMFCFA and (b) corresponding calibration curve.

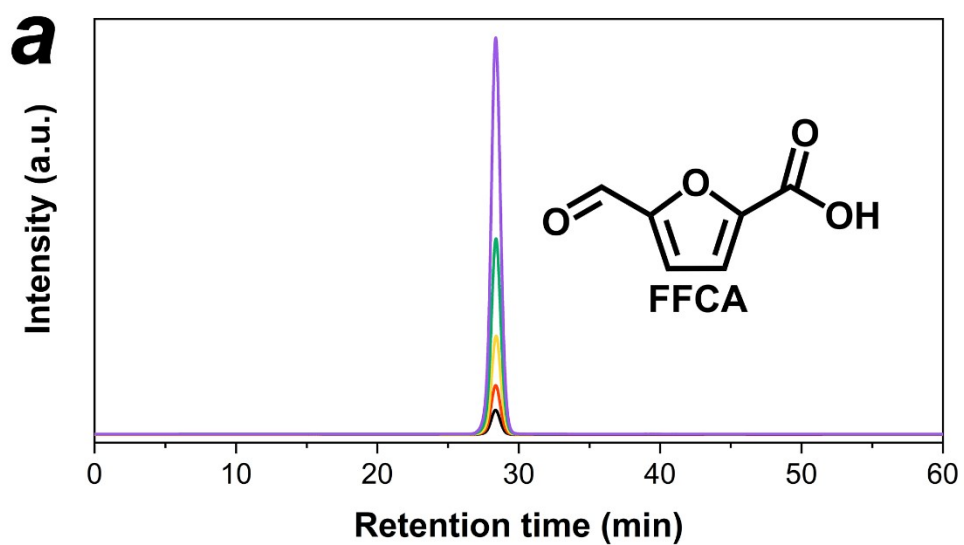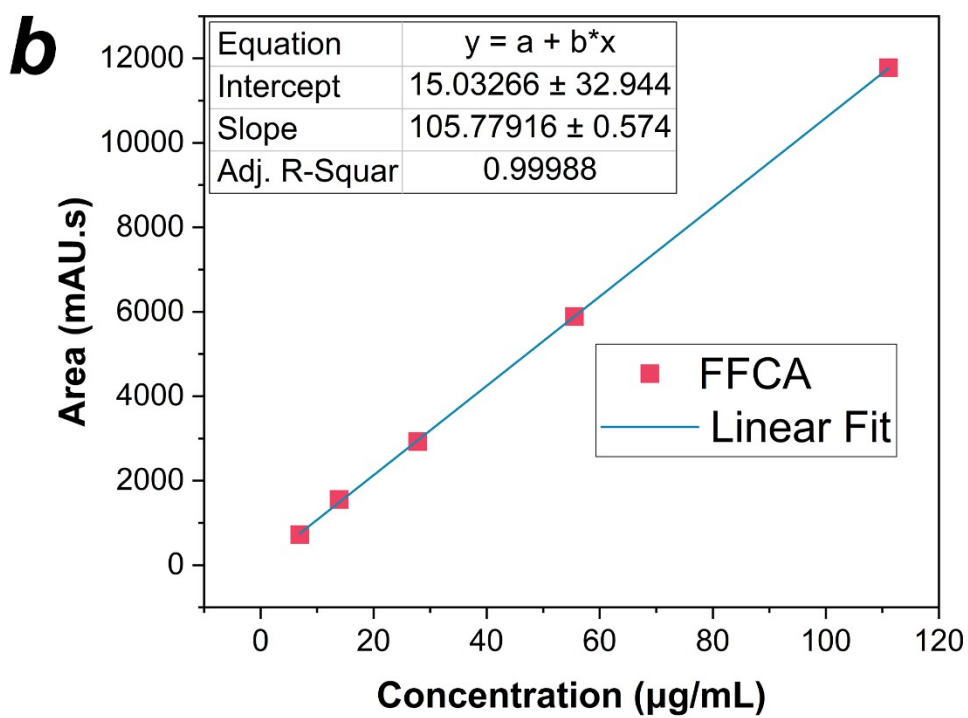

**Figure S20** HPLC spectra for (a) standard product of FFCA and (b) corresponding calibration curve.

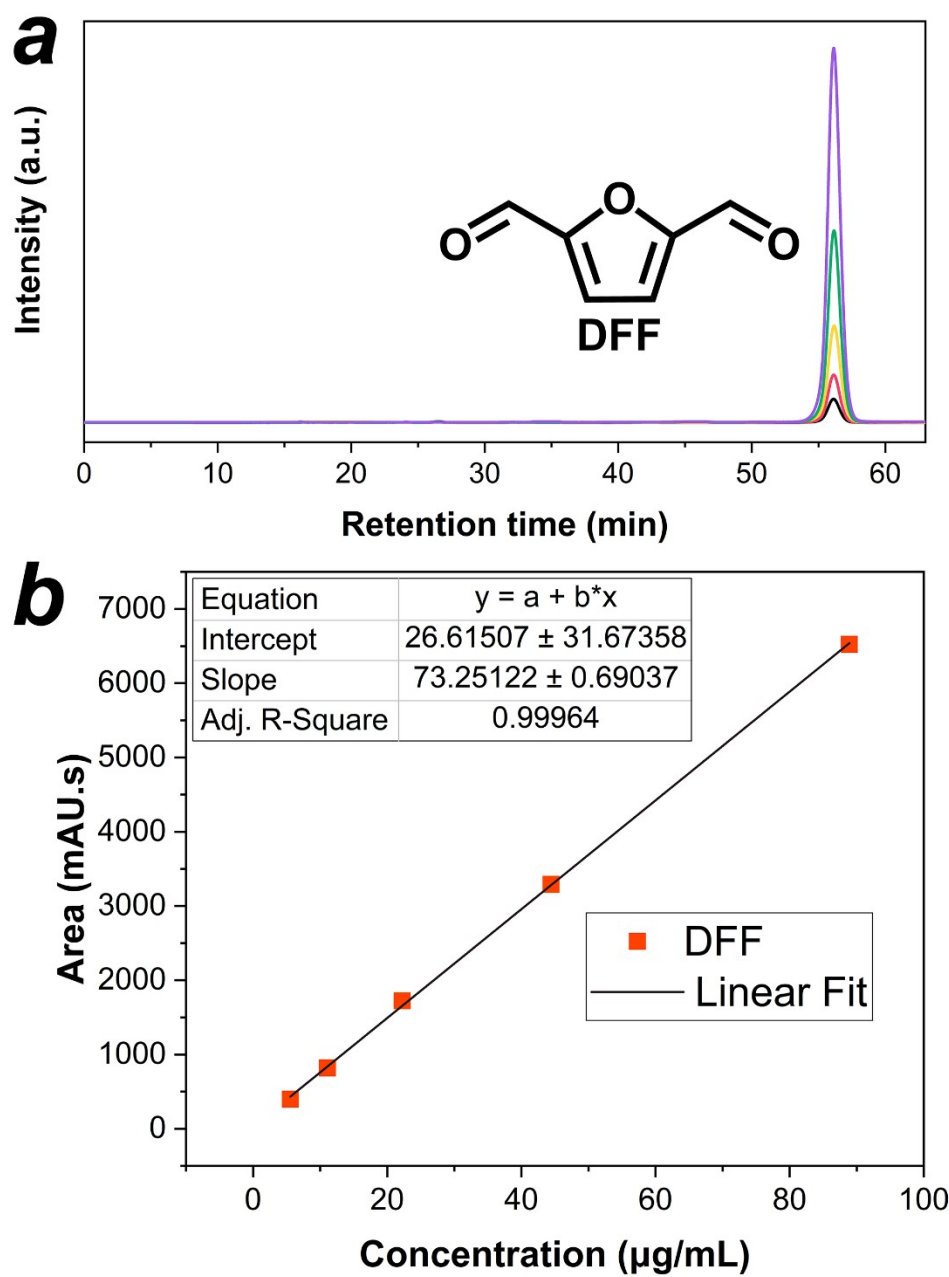

**Figure S21** HPLC spectra for (a) standard product of DDF and (b) corresponding calibration curve.



### The anode, cathode, and overall reactions for FUR electrochemical oxidation

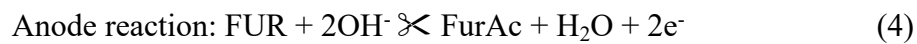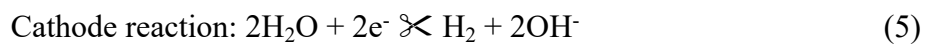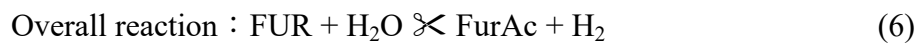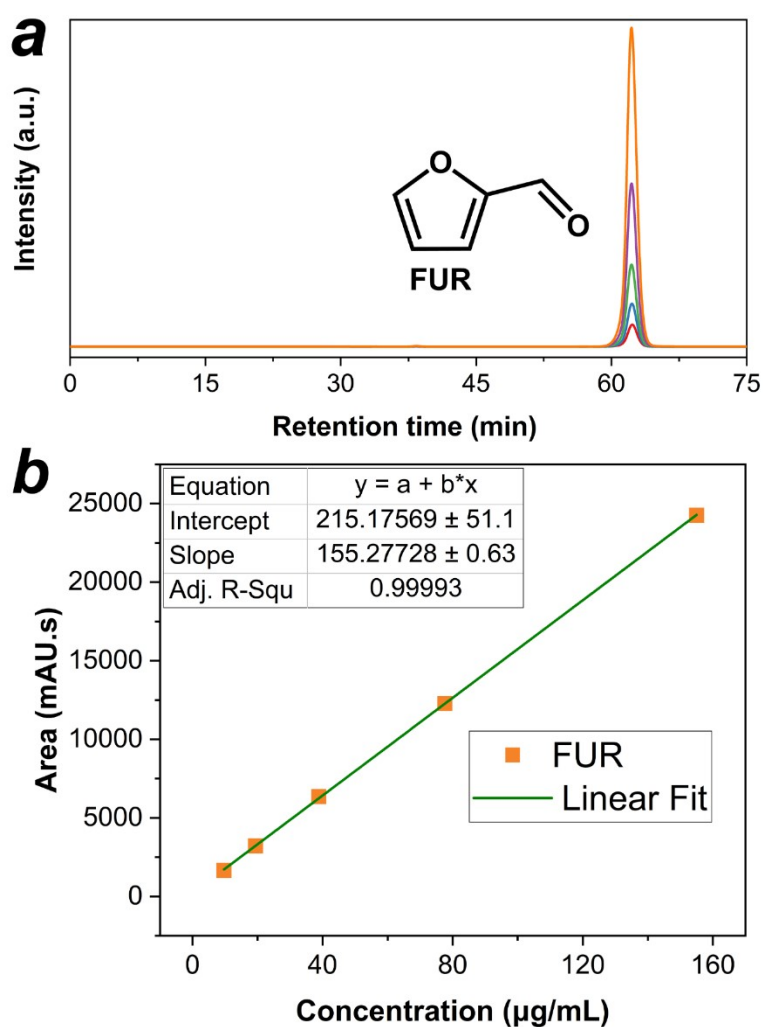

**Figure S22** HPLC spectra for (a) standard product of FUR and (b) corresponding calibration curve.

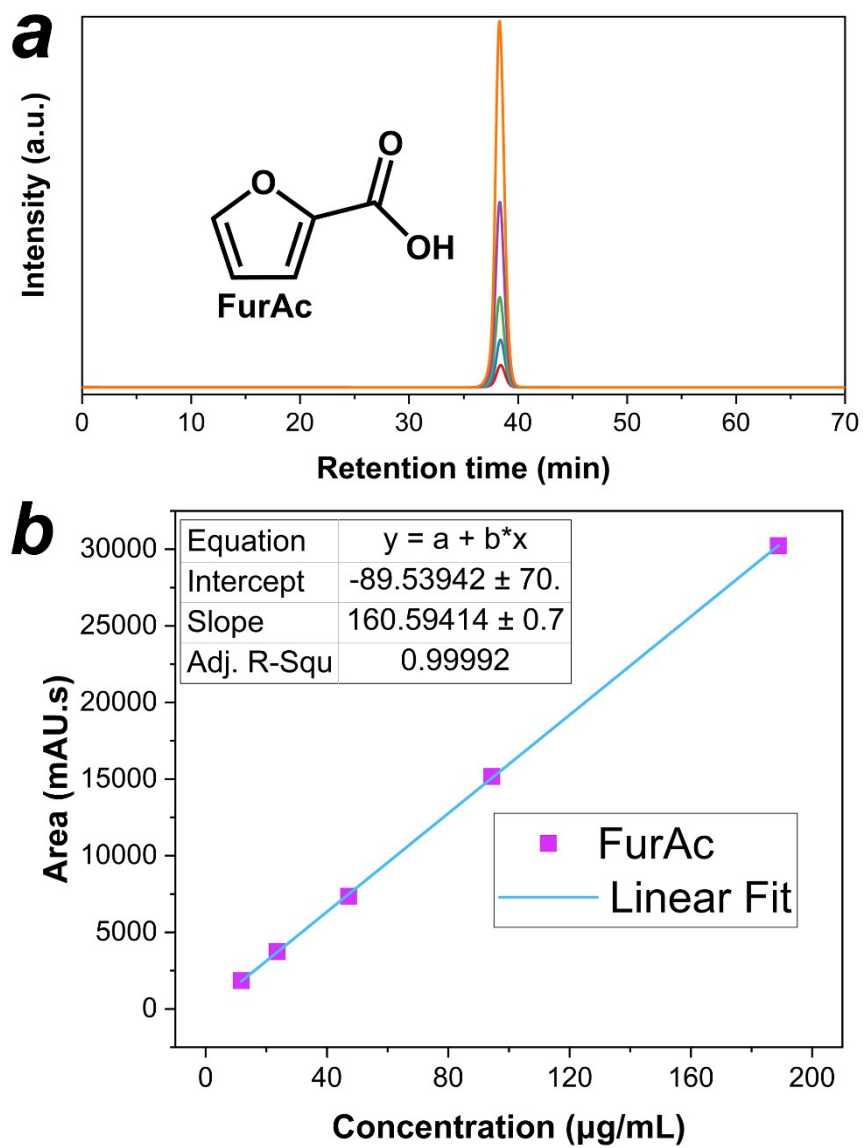

**Figure S23** HPLC spectra for (a) standard product of FurAc and (b) corresponding calibration curve.

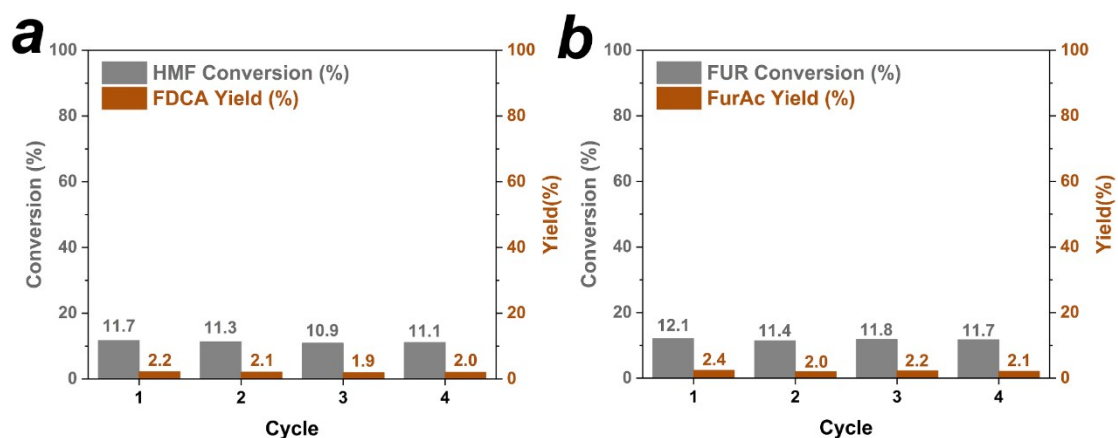

**Figure S24** The conversion of and yields towards (a) HMF to FDCA and (b) FUR to FurAc by using NF in four successive electrolysis cycles.

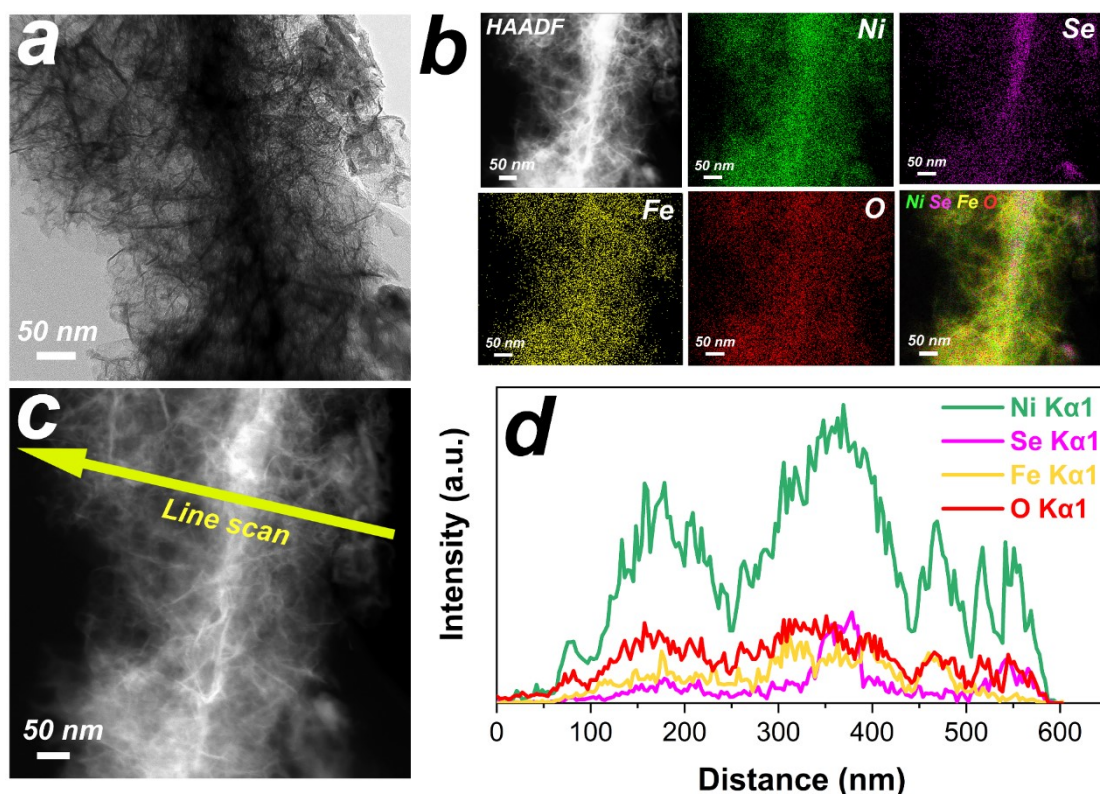

**Figure S25** (a) TEM image (b) EDX elemental mapping images and (c,d) TEM line-scan analysis of Ni<sub>x</sub>Se<sub>y</sub>-NiFe LDH after stability test.



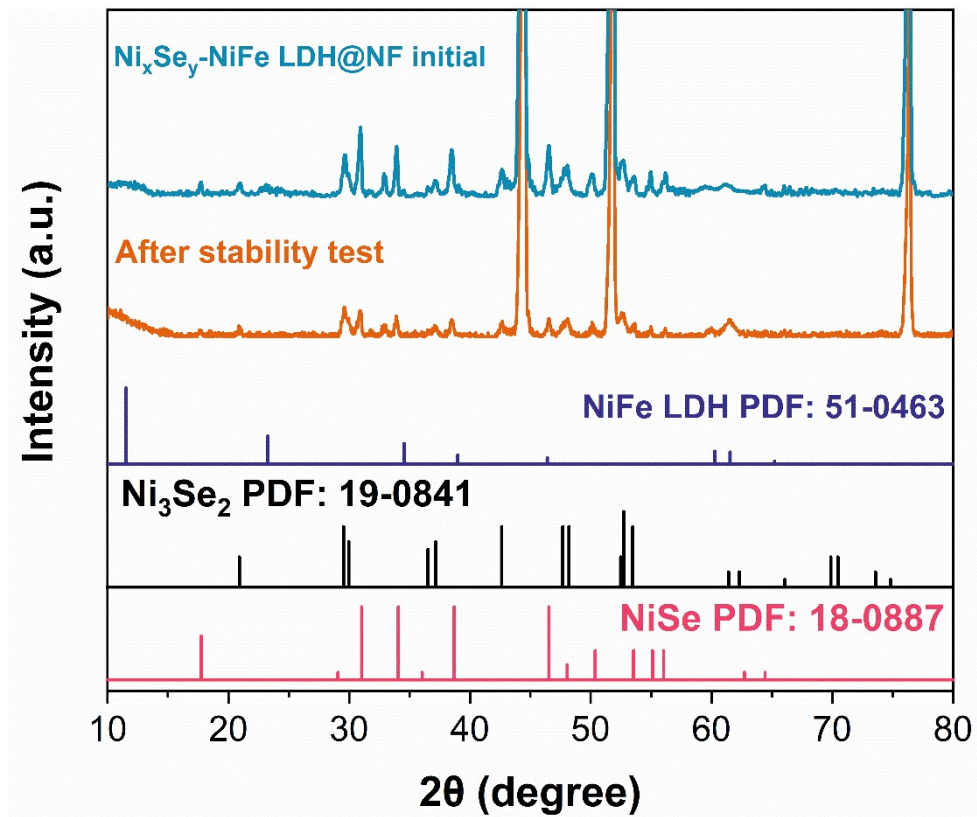

Figure S26 XRD pattern of Ni<sub>x</sub>Se<sub>y</sub>-NiFe LDH@NF before and after stability test.

Table S1. Comparison of the performance of Ni<sub>x</sub>Se<sub>y</sub>-NiFe LDH@NF with other reported transition metal-based catalysts towards electrochemical oxidation of HMF to FDCA

| Electrode                                       | Electrolyte       | Potential Applied | HMF Conversion | FDCA Yield           | FE          | Cycles | Ref.             |
|-------------------------------------------------|-------------------|-------------------|----------------|----------------------|-------------|--------|------------------|
| <b>Ni<sub>x</sub>Se<sub>y</sub>-NiFe LDH@NF</b> | 1M KOH+10mM HMF   | 1.423V            | 99.6%~99.4%    | 99.3%~97.0%          | 98.9%~96.7% | 6      | <b>This work</b> |
| <b>NiCo<sub>2</sub>O<sub>4</sub>@Ni Foam</b>    | 1M KOH+5mM HMF    | 1.5V              | 99.6%~90%      | 90.8%                | 87.5%~80%   | 3      | [1]              |
| <b>NiSe@NiO<sub>x</sub></b>                     | 1M KOH+10mM HMF   | 1.423V            | 100%~98%       | 99%~93%              | 100%~98%    | 6      | [2]              |
| <b>NiFe LDH-CFP</b>                             | 1M KOH+10mM HMF   | 1.33V             | 98%~93%        | 98%                  | 98.6%       | 4      | [3]              |
| <b>NiCoFe LDHs/CFP</b>                          | 1M NaOH+10mM HMF  | 1.52V             | 95.5%          | 84.9% of Selectivity | 90%         | 1      | [4]              |
| <b>NiB<sub>x</sub>-P<sub>0.07</sub></b>         | 0.1M KOH+10mM HMF | 1.464V            | 99.9%~99.9%    | 90.6%~88.7%          | 92.5%       | 3      | [5]              |
| <b>CuCo<sub>2</sub>O<sub>4</sub></b>            | 1M KOH+50mM HMF   | 1.45V             | Not mentioned  | 93.7%                | 94%         | 6      | [6]              |
| <b>Cu<sub>x</sub>S@NiCo-LDHs</b>                | 1M KOH+10mM HMF   | 1.32V             | Not mentioned  | ~99%                 | ~99%        | 5      | [7]              |
| <b>CoO-CoSe<sub>2</sub></b>                     | 1M KOH+10mM HMF   | 1.43V             | ~100%          | 99%                  | 97.9%       | 5      | [8]              |
| <b>Ni<sub>3</sub>N@C</b>                        | 1M KOH+10mM HMF   | 1.45V             | Not mentioned  | ~98%                 | ~99%        | 6      | [9]              |

Table S2. Comparison of the performance of Ni<sub>x</sub>Se<sub>y</sub>-NiFe LDH@NF with other reported electrocatalysts towards electrochemical oxidation of FUR to FurAc

| Electrode                                    | Electrolyte                        | Applied Potential or Current | FUR Conversion | FurAc Yield        | FE            | Cycles | Ref.      |
|----------------------------------------------|------------------------------------|------------------------------|----------------|--------------------|---------------|--------|-----------|
| Ni <sub>x</sub> Se <sub>y</sub> -NiFe LDH@NF | 1M KOH+20mM FUR                    | 1.423V                       | 99.7%~99.1%    | 99.7%~97.3%        | 99.5%~97.1%   | 6      | This work |
| Ni <sub>2</sub> P/Ni/NF                      | 1M KOH+30mM FUR                    | 1.423V                       | 98%            | 98%~96%            | ~100%         | 3      | [10]      |
| Ni <sub>2</sub> P/CFC                        | 1M KOH+50mM FUR                    | ~1.4V                        | Not mentioned  | ~100%              | 99%~95%       | 3      | [11]      |
| NiCoMn-LDHs/NF                               | 1M NaOH+1mM FUR                    | 1.5V                         | 96.8%~90%      | 92.4%~85%          | ~70%          | 4      | [12]      |
| NiGF                                         | 1 M NaCl+NaOH+LiOH + 10% (w/w) FUR | $I_{app}/I_{th} = 1.3$       | 87%            | 83%                | Not mentioned | 1      | [13]      |
| Ni                                           | carbonate buffer +50mM FUR         | 0.8mA/cm <sup>2</sup>        | Not mentioned  | 80%                | Not mentioned | 1      | [14]      |
| Au                                           | carbonate buffer +35mM FUR         | 0.15V <sub>(SCE)</sub>       | 56%            | 95% of Selectivity | Not mentioned | 1      | [14]      |



## References:

1. M. J. Kang, H. Park, J. Jegal, S. Y. Hwang, Y. S. Kang and H. G. Cha, *Appl. Catal., B*, 2019, **242**, 85-91.
2. L. Gao, Z. Liu, J. Ma, L. Zhong, Z. Song, J. Xu, S. Gan, D. Han and L. Niu, *Appl. Catal., B*, 2020, **261**, 118235.
3. W.-J. Liu, L. Dang, Z. Xu, H.-Q. Yu, S. Jin and G. W. Huber, *ACS Catal.*, 2018, **8**, 5533-5541.
4. M. Zhang, Y. Liu, B. Liu, Z. Chen, H. Xu and K. Yan, *ACS Catal.*, 2020, **10**, 5179-5189.
5. X. Song, X. Liu, H. Wang, Y. Guo and Y. Wang, *Ind. Eng. Chem. Res.*, 2020, **59**, 17348-17356.
6. Y. Lu, C.-L. Dong, Y.-C. Huang, Y. Zou, Z. Liu, Y. Liu, Y. Li, N. He, J. Shi and S. Wang, *Angew. Chem., Int. Ed.*, 2020, **59**, 19215-19221.
7. X. Deng, X. Kang, M. Li, K. Xiang, C. Wang, Z. Guo, J. Zhang, X.-Z. Fu and J.-L. Luo, *J. Mater. Chem. A*, 2020, **8**, 1138-1146.
8. X. Huang, J. Song, M. Hua, Z. Xie, S. Liu, T. Wu, G. Yang and B. Han, *Green Chem.*, 2020, **22**, 843-849.
9. N. Zhang, Y. Zou, L. Tao, W. Chen, L. Zhou, Z. Liu, B. Zhou, G. Huang, H. Lin and S. Wang, *Angew. Chem., Int. Ed.*, 2019, **58**, 15895-15903.
10. N. Jiang, X. Liu, J. Dong, B. You, X. Liu and Y. Sun, *ChemNanoMat*, 2017, **3**, 491-495.
11. X. Zhang, M. Han, G. Liu, G. Wang, Y. Zhang, H. Zhang and H. Zhao, *Appl. Catal., B*, 2019, **244**, 899-908.
12. B. Liu, S. Xu, M. Zhang, X. Li, D. Decarolis, Y. Liu, Y. Wang, E. K. Gibson, C. R. A. Catlow and K. Yan, *Green Chem.*, 2021, **23**, 4034-4043.
13. G. Chamoulaud, D. Floner, C. Moinet, C. Lamy and E. M. Belgsir, *Electrochim. Acta*, 2001, **46**, 2757-2760.
14. P. Parpot, A. P. Bettencourt, G. Chamoulaud, K. B. Kokoh and E. M. Belgsir, *Electrochim. Acta*, 2004, **49**, 397-403.
